# Supplementary material for: An Overview of Angiostrongylus cantonensis (Nematoda: Angiostrongylidae), an Emerging Cause of Human Angiostrongylosis on the Indian Subcontinent
Source: MDPI journal article supplement (doi:10.3390/pathogens12060851), 2023-06-20
Supplement: s1 [file s1]

## Supplementary files

**Table S1.** List of Indian states where eating snail meat is common.

| Family        | Species                         | Places                 | Preparation | References                |
|---------------|---------------------------------|------------------------|-------------|---------------------------|
| Ampullariidae | <i>Pila globosa</i>             | CH, MP, NE, OR, TN, WB | Cooked      | [136,138,142,166,187–191] |
| Ampullariidae | <i>Pila scutata</i>             | BR, NE, WB             | Cooked      | [138,142]                 |
| Ampullariidae | <i>Pila theobaldi</i>           | NE, WB                 | Cooked      | [142]                     |
| Ampullariidae | <i>Pila virens</i>              | NE, WB                 | Cooked      | [142]                     |
| Ariophantidae | <i>Cryptozona bistrialis</i>    | NE, WB                 | Cooked      | [136,140,143]             |
| Lymnaeinae    | <i>Lymnaea</i> sp.              | NE                     | Cooked      | [192,193]                 |
| Pachychilidae | <i>Brotia costua</i>            | WB                     | Cooked      | [139]                     |
| Paludomidae   | <i>Paludomus</i> sp.            | NE                     | Cooked      | [192]                     |
| Planorbidae   | <i>Anisus convexiusculus</i>    | NE, WB                 | Cooked      | [140,143]                 |
| Viviparidae   | <i>Angulyagra</i> sp.           | NE                     | Cooked      | [194]                     |
| Viviparidae   | <i>Bellamya bengalensis</i>     | JK, NE, WB             | Cooked      | [139,142,143,195]         |
| Viviparidae   | <i>Bellamya dissimilis</i>      | NE                     | Cooked      | [136,191]                 |
| Viviparidae   | <i>Bellamya</i> sp.             | BR                     | Cooked      | [138]                     |
| Viviparidae   | <i>Cipangopaludina lecythis</i> | NE                     | Cooked      | [194]                     |
| Viviparidae   | <i>Viviparus viviparus</i>      | BR                     | Cooked      | [196]                     |
| Viviparidae   | <i>Viviparus bengalensis</i>    | BR                     | Cooked      | [196]                     |

State Abbreviations: BR — Bihar, CH— Chandigarh, JK — Jharkhand; KL — Kerala, MP — Madhya Pradesh, OR — Orissa, TN — Tamil Nadu, WB — West Bengal. NE — Northeast India includes (AR — Arunachal Pradesh, AS — Assam, NL — Nagaland, MZ—Mizoram, SK — Sikkim, and T — Tirupura), where eating snails is more common.

**Table S2.** Overview of snakes are used for zootherapy in tribal communities.

| Family     | Species                     | Location    | Application   | References        |
|------------|-----------------------------|-------------|---------------|-------------------|
| Colubridae | <i>Dendrelaphis tristis</i> | NE*         | Ethnomedicine | [197]             |
| Colubridae | <i>Ptyas mucosa</i>         | NE*, MH, TN | Ethnomedicine | [159,198]         |
| Elapidae   | <i>Naja naja</i>            | NE*, RJ, TN | Ethnomedicine | [161,162,190,199] |
| Elapidae   | <i>Ophiophagus hannah</i>   | NE*, TN     | Ethnomedicine | [162,197]         |
| Pythonidae | <i>Python reticulatus</i>   | NE*, TN     | Ethnomedicine | [162,197,200]     |
| Viperidae  | <i>Daboia</i> sp.           | NE*         | Ethnomedicine | [192]             |
| Viperidae  | <i>Echis coloratus</i>      | NE*         | Ethnomedicine | [164]             |

State abbreviations: MH – Maharashtra, RJ – Rajasthan, TN – Tamil Nadu, NE – Northeast India (AR – Arunachal Pradesh, AS – Assam, NL – Nagaland, MZ – Mizoram, SK – Sikkim, T – Tripura). NE\* – Northeastern India (Indigenous peoples use snakes in the practice of traditional medicine).

**Table S3.** Overview of where frog meat is common.

| Family         | species                           | Location   | Preparation | Reference     |
|----------------|-----------------------------------|------------|-------------|---------------|
| Bufonidae      | <i>Duttaphrynus melanostictus</i> | MZ         | Cooked      | [174]         |
| Dicroglossidae | <i>Euphlyctis cyanophlyctis</i> , | AS, NL, JK | Cooked      | [176,201–203] |
| Dicroglossidae | <i>Euphlyctis hexadactylus</i> ,  | AS         | Cooked      | [204]         |
| Dicroglossidae | <i>Euphlyctis ghoshi</i>          | NL         | Cooked      | [204]         |
| Dicroglossidae | <i>Fejervarya limnocharis</i>     | JK, NL     | Cooked      | [176,202]     |
| Dicroglossidae | <i>Fejervarya teraiensis</i>      | NL         | Cooked      | [175,176]     |
| Dicroglossidae | <i>Hoplobatrachus crassus</i>     | AS, NL     | Cooked      | [175]         |
| Dicroglossidae | <i>Hoplobatrachus litoralis</i>   | NL         | Cooked      | [176,204]     |
| Dicroglossidae | <i>Hoplobatrachus rugulosus</i>   | NL         | Cooked      | [175,176]     |
| Dicroglossidae | <i>Hoplobatrachus tigerinus</i> , | AS, NL, WB | Cooked      | [175,176]     |
| Dicroglossidae | <i>Nanorana liebigii</i>          | AS, NL     | Cooked      | [176,204]     |
| Dicroglossidae | <i>Phrynoderma karaavali</i>      | TN, KL     | Cooked      | [205–209]     |
| Megophryidae   | <i>Megophrys major</i>            | NL         | Cooked      | [175,176]     |
| Megophryidae   | <i>Megophrys flavipunctata</i>    | NL         | Cooked      | [175,176]     |
| Ranidae        | <i>Amolops Himalayanu</i>         | MZ, SK     | Cooked      | [174,210]     |
| Ranidae        | <i>Amolops indoburmanensis</i>    | MZ         | Cooked      | [174]         |
| Ranidae        | <i>Amolops marmoratus</i>         | NL         | Cooked      | [175,176]     |
| Ranidae        | <i>Odorrana chloronota</i>        | MZ         | Cooked      | [174]         |
| Ranidae        | <i>Pterorana Khare</i>            | NL         | Cooked      | [175,176]     |
| Ranidae        | <i>Rana Tigrina</i>               | AP, UK, MP | Cooked      | [161,201,211] |
| Ranidae        | <i>Sylvirana lacrima</i>          | MZ         | Cooked      | [174]         |
| Rhacophoridae  | <i>Polypedates teraiensis</i>     | NL         | Cooked      | [176,202]     |
| Rhacophoridae  | <i>Polypedates leucomystax</i>    | AS         | Cooked      | [204]         |
| Rhacophoridae  | <i>Rhacophorus bipunctatus</i>    | NL         | Cooked      | [175,176]     |
| Rhacophoridae  | <i>Rhacophorus maximus</i>        | NL         | Cooked      | [175,176]     |
| Rhacophoridae  | <i>Zhangixalus smaragdinus</i>    | MZ         | Cooked      | [174]         |

State abbreviation; AR — Arunachal Pradesh, AS — Assam, JK — Jharkhand; KL — Kerala, NL — Nagaland, MP — Madhya Pradesh. MZ — Mizoram, SK — Sikkim, UK — Uttarakhand, WB — West Bengal, TN — Tamil Nadu.
